# Supplementary material
Source: PubMed Central journal article supplement (PMC3462942)

## 1 Supplemental Table 1

## 2 Characteristics of study subjects

|                           | Lipodystrophic patients<br>( n = 10 ) | Healthy controls<br>( n = 10 ) |
|---------------------------|---------------------------------------|--------------------------------|
| Age (yr)                  | 23.1±1.8                              | 25.1±1.2                       |
| Male/Female               | 3/7                                   | 3/7                            |
| BMI (kg/ m <sup>2</sup> ) | 16.2±0.8                              | 20.0±0.3 <sup>A</sup>          |
| Body fat (%)              | 7.0±1.3                               | NA                             |
| Plasma leptin (ng/ml)     | 1.6±0.4                               | 7.1±2.5 <sup>B</sup>           |
| Plasma glucose (mg/dl)    | 101.6±12.1                            | 90.3±6.0                       |
| Plasma insulin (μU/ml)    | 6.6±1.1                               | 6.0±2.5                        |

3 Data are means ± SEM. Body fat was measured by dual energy x-ray absorptiometry. Blood samples

4 in patients were obtained under leptin-off conditions. <sup>A,B</sup>*p* < 0.01 (Student's *t* test). NA: not available.

5

## 6 Supplemental Table 2

7 Brain activations for the contrast “food > non-food” in controls and leptin-off patients

8

| ROI area                         | Fasting              |     |     |        | Postprandial |     |     |        |      |
|----------------------------------|----------------------|-----|-----|--------|--------------|-----|-----|--------|------|
|                                  | Coordinate           |     |     | Zscore | Coordinate   |     |     | Zscore |      |
|                                  | x                    | y   | z   |        | x            | y   | z   |        |      |
| <b>Controls</b>                  | Hypothalamus         |     |     |        |              |     |     |        |      |
|                                  | Orbitofrontal cortex | 34  | 14  | -22    | 4.07         | 38  | 44  | -14    | 3.98 |
|                                  |                      | -28 | 28  | -18    | 3.06         | -22 | 30  | -20    | 4.31 |
|                                  | Amygdala             | 22  | -2  | -24    | 2.91         |     |     |        |      |
|                                  |                      | -22 | 0   | -26    | 2.95         |     |     |        |      |
|                                  | Hippocampus          |     |     |        |              |     |     |        |      |
|                                  | Insula               | 40  | -2  | -4     | 4.07         |     |     |        |      |
|                                  |                      | -40 | -4  | -2     | 4.79         | -38 | -4  | 2      | 2.96 |
|                                  | Nucleus accumbens    |     |     |        |              |     |     |        |      |
|                                  | Caudate              | 14  | 20  | 6      | 3.32         |     |     |        |      |
|                                  |                      | -12 | 20  | -6     | 3.18         |     |     |        |      |
|                                  | Putamen              | 36  | -4  | -2     | 3.03         |     |     |        |      |
|                                  |                      | -14 | 8   | -2     | 2.82         |     |     |        |      |
|                                  | Globus pallidus      | 10  | 0   | 0      | 2.91         |     |     |        |      |
| -10                              |                      | 6   | -2  | 3.48   |              |     |     |        |      |
| <b>Patients<br/>(leptin-off)</b> | Hypothalamus         |     |     |        |              |     |     |        |      |
|                                  | Orbitofrontal cortex | -24 | 30  | -16    | 4.56         | -26 | 28  | -16    | 3.80 |
|                                  |                      | 22  | -6  | -16    | 3.01         | 22  | -4  | -22    | 4.40 |
|                                  | Amygdala             |     |     |        |              | -20 | -4  | -24    | 3.86 |
|                                  |                      |     |     |        |              |     |     |        |      |
|                                  | Hippocampus          | -28 | -32 | -2     | 4.03         | -24 | -32 | -4     | 2.75 |
|                                  |                      | 40  | -4  | -4     | 4.22         | 38  | -4  | -2     | 4.05 |
|                                  | Insula               | -40 | -8  | 2      | 3.75         | -38 | -10 | 4      | 3.83 |
|                                  |                      |     |     |        |              |     |     |        |      |
|                                  | Nucleus accumbens    |     |     |        |              | -12 | 10  | -8     | 3.17 |
|                                  | Caudate              | 10  | 6   | 0      | 3.69         | 12  | 10  | 0      | 2.64 |
|                                  |                      | -10 | 10  | 8      | 4.52         |     |     |        |      |
|                                  | Putamen              | -14 | 8   | -4     | 3.95         | -12 | 8   | -8     | 3.51 |
|                                  |                      |     |     |        |              |     |     |        |      |
| Globus pallidus                  | 12                   | 8   | -6  | 4.06   |              |     |     |        |      |
|                                  | -12                  | 6   | -2  | 3.65   | -12          | 8   | -6  | 3.49   |      |

9 Coordinate indicates the highest activity voxel of the cluster by MNI systems. Negative x axis

10 coordinates indicate left hemisphere. Z-score represents level of significance.

11

12 Supplemental Table 3

13 Brain activations for the contrast “food > non-food” in leptin-on patients

| ROI area             | Fasting           |     |     |        | Postprandial      |    |    |        |
|----------------------|-------------------|-----|-----|--------|-------------------|----|----|--------|
|                      | <u>Coordinate</u> |     |     | Zscore | <u>Coordinate</u> |    |    | Zscore |
|                      | x                 | y   | z   |        | x                 | y  | z  |        |
| Hypothalamus         |                   |     |     |        |                   |    |    |        |
| Orbitofrontal cortex | 26                | 24  | -20 | 3.85   | 32                | 50 | -6 | 3.29   |
|                      | -28               | 26  | -18 | 4.25   | -30               | 42 | -8 | 3.01   |
| Amygdala             | 20                | -2  | -20 | 3.43   |                   |    |    |        |
|                      | -22               | 0   | -24 | 3.39   |                   |    |    |        |
| Hippocampus          | 20                | -28 | -6  | 3.85   |                   |    |    |        |
|                      | -20               | -30 | -4  | 4.61   |                   |    |    |        |
| Insula               | 38                | -4  | 2   | 3.79   |                   |    |    |        |
|                      | -38               | -6  | 0   | 4.55   | -32               | 10 | -4 | 3.67   |
| Nucleus accumbens    |                   |     |     |        |                   |    |    |        |
| Caudate              | 10                | 6   | 0   | 3.14   |                   |    |    |        |
| Putamen              | 36                | -4  | 2   | 3.14   |                   |    |    |        |
| Globus pallidus      | 16                | -2  | 4   | 4.14   |                   |    |    |        |
|                      | -22               | -10 | 4   | 3.54   |                   |    |    |        |

14 Coordinate indicates the highest activity voxel of the cluster by MNI systems. Negative x axis

15 coordinates indicate left hemisphere. Z-score represents level of significance.

16

17 Supplemental Table 4

18 Laboratory tests in patients

|                        | Leptin-off | Leptin-on            |
|------------------------|------------|----------------------|
| Plasma leptin (ng/ml)  | 1.6±0.4    | 5.6±1.6 <sup>^</sup> |
| Plasma glucose (mg/dl) | 101.6±12.1 | 98.9±12.0            |
| Plasma insulin (μU/ml) | 6.6±1.1    | 6.2±0.9              |

19 Data are means ± SEM (n=10 each group). <sup>^</sup>*p* < 0.01 (paired Student's *t* test).

20

21 Supplemental Figure 1

22 Study design. (A) Schema of overall test procedure. The same functional magnetic resonance

23 imaging procedure was performed under fasting and postprandial conditions on separate days.

24 (B) Imaging task. Food and non-food pictures were presented randomly in an event-related

25 design. Each picture was presented for 5 s followed by a rating image for 3 s and a mosaic

26 image for 7 s. Each session comprised 75 stimuli (45 food and 30 non-food pictures). In an

27 imaging test, 3 divided sessions were conducted continuously. (C) Examples of food,

28 non-food, rating scale, and mosaic images. 135 food and 90 non-food pictures were matched

29 for size, brightness, color distribution, and visual complexity.

# Supplemental Figure 1

A

## Fasting condition

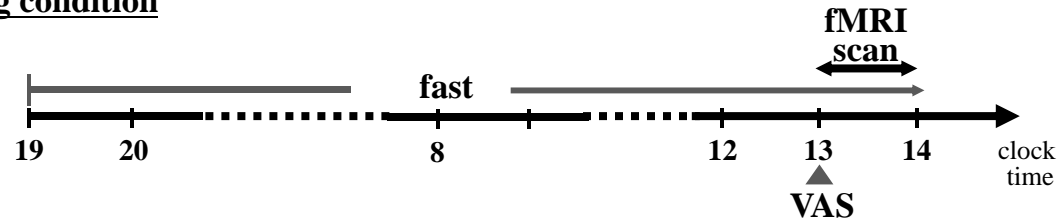

## Postprandial condition

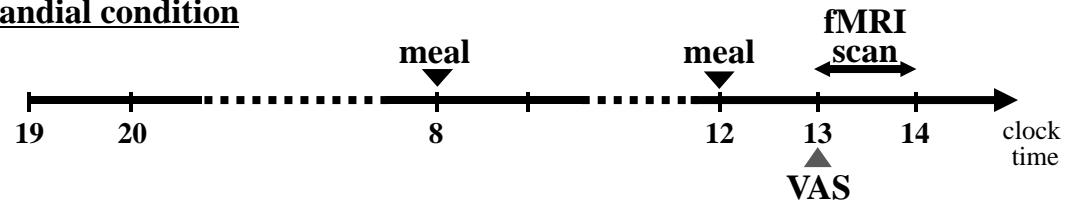

B

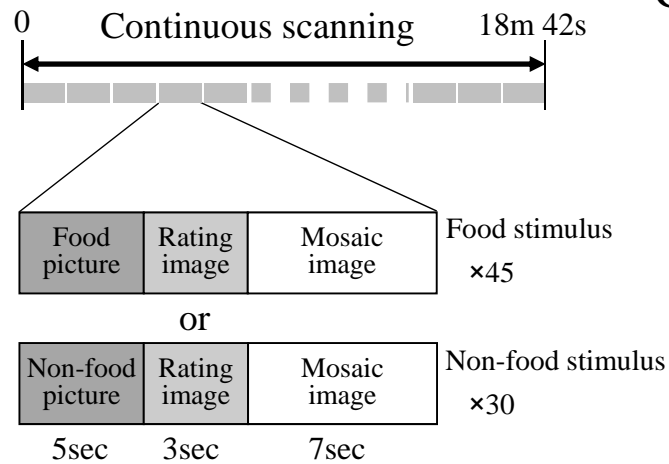

C

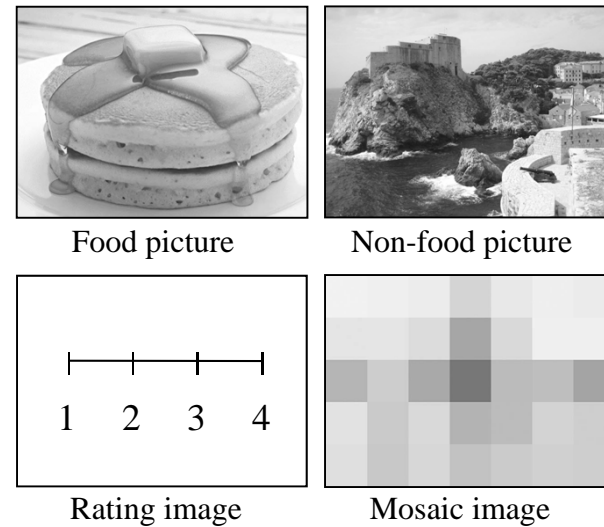

Supplement: supp_jc.2012-1872_12-1872_supp_data.pdf [file supp_jc.2012-1872_12-1872_supp_data.pdf]
